# Supplementary figures and images for: Nickel(ii) complexes with amide ligands: oxidative dehydrogenation of the amines in a tetradentate diamide–diamine ligand
Source: Royal Society of Chemistry journal article supplement (doi:10.1039/b107378h), 2002-01-01

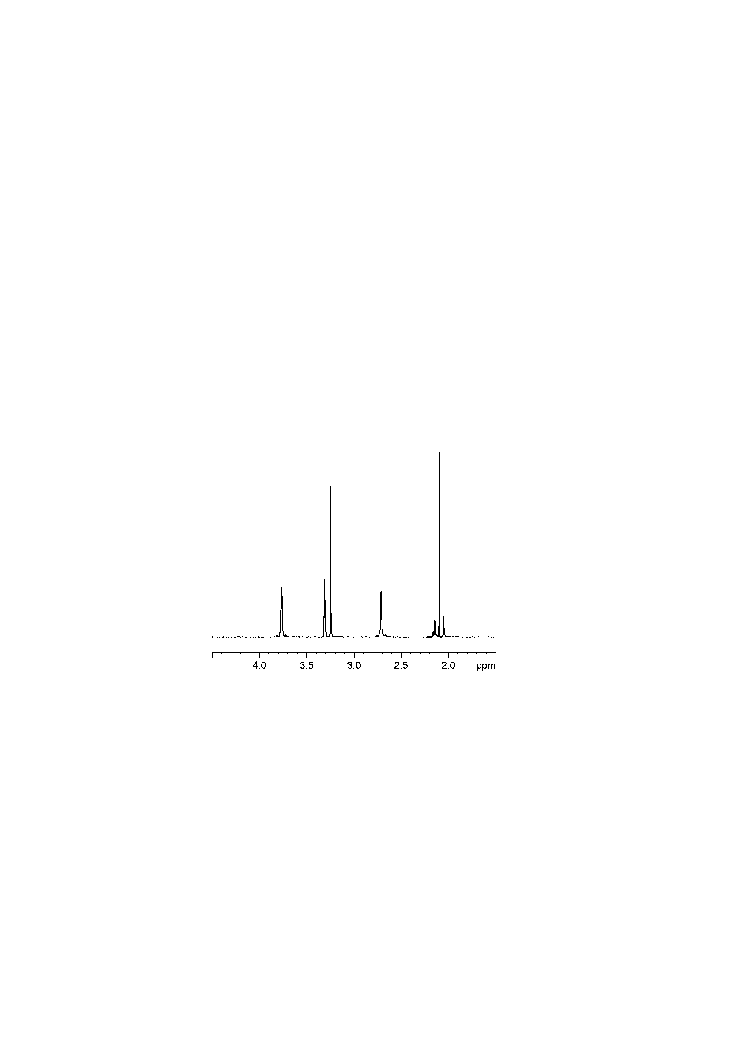

Supplement: b107378h-5.doc [file b107378h-5.doc]
